# Supplementary figures and images for: Whole Body MRI in the Detection of Lymph Node Metastases in Patients with Testicular Germ Cell Cancer
Source: MDPI journal article supplement (doi:10.3390/life12020212), 2022-01-29

Supplementary Materials: Patient population flow chart.

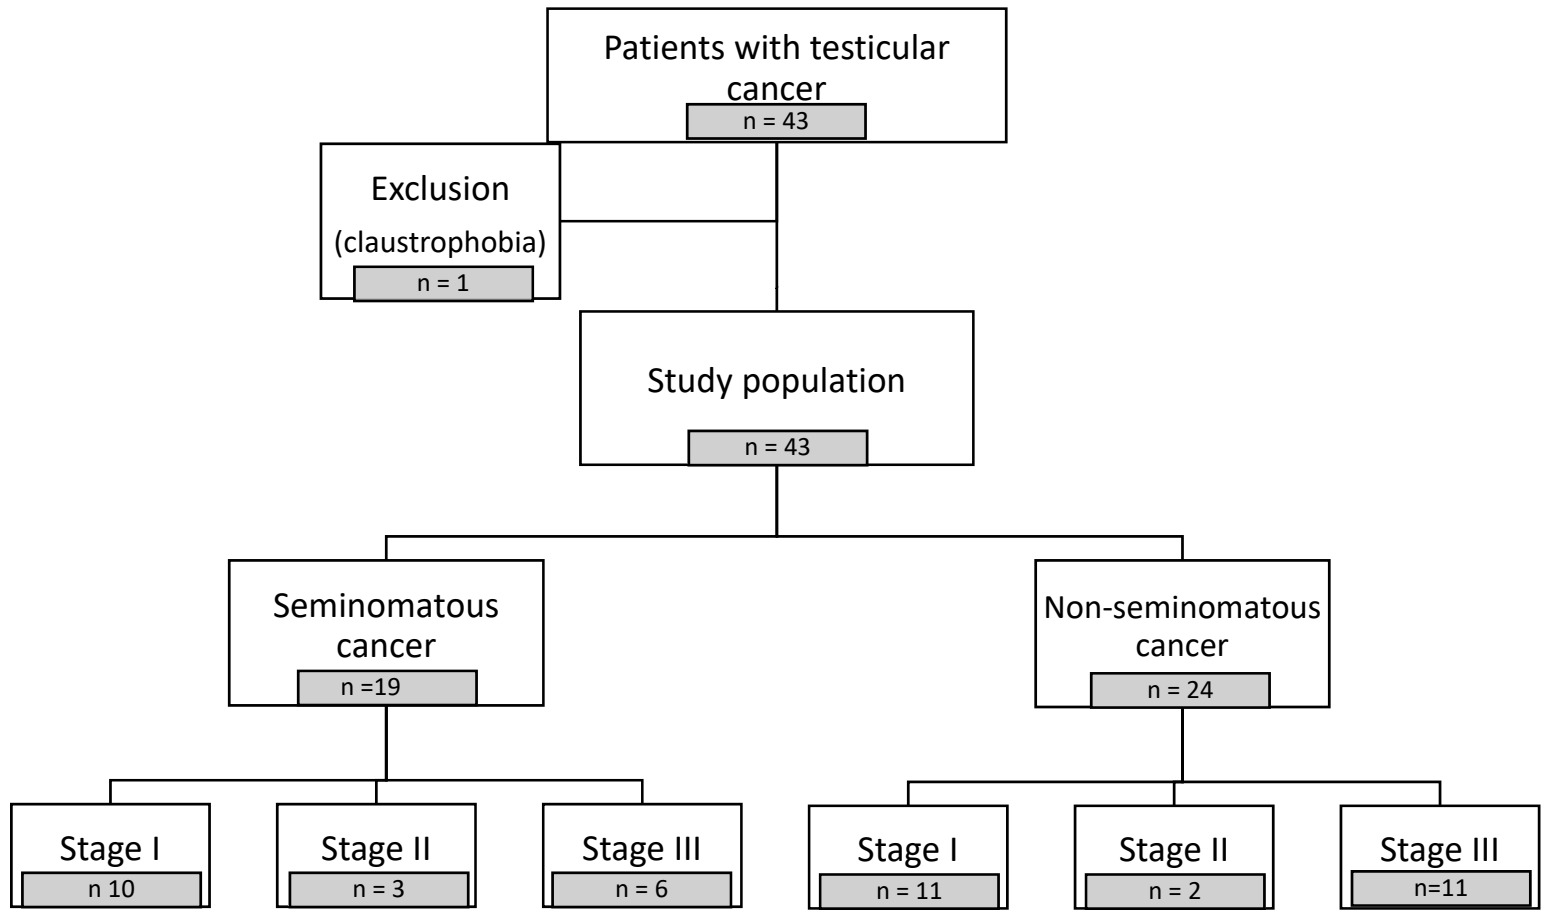

Supplement: s1 [file s1]
